# Supplementary material
Source: PubMed Central journal article supplement (PMC6707020)

## Supplementary Online Content

Rengan R, Mick R, Pryma DA, et al. Clinical outcomes of the HIV protease inhibitor nelfinavir with concurrent chemoradiotherapy for unresectable stage IIIA/IIIB non-small cell lung cancer: a phase 1/2 trial. *JAMA Oncol*. Published online August 22, 2019. doi:10.1001/jamaoncol.2019.2095

**eFigure.** Phase I/II Trial of Protease Inhibitor Nelfinavir With Concurrent Chemoradiotherapy For Stage IIIA/IIIB Inoperable NSCLC

This supplementary material has been provided by the authors to give readers additional information about their work.

**eFigure.** Phase I/II Trial of Protease Inhibitor Nelfinavir With Concurrent Chemoradiotherapy For Stage IIIA/IIIB Inoperable NSCLC

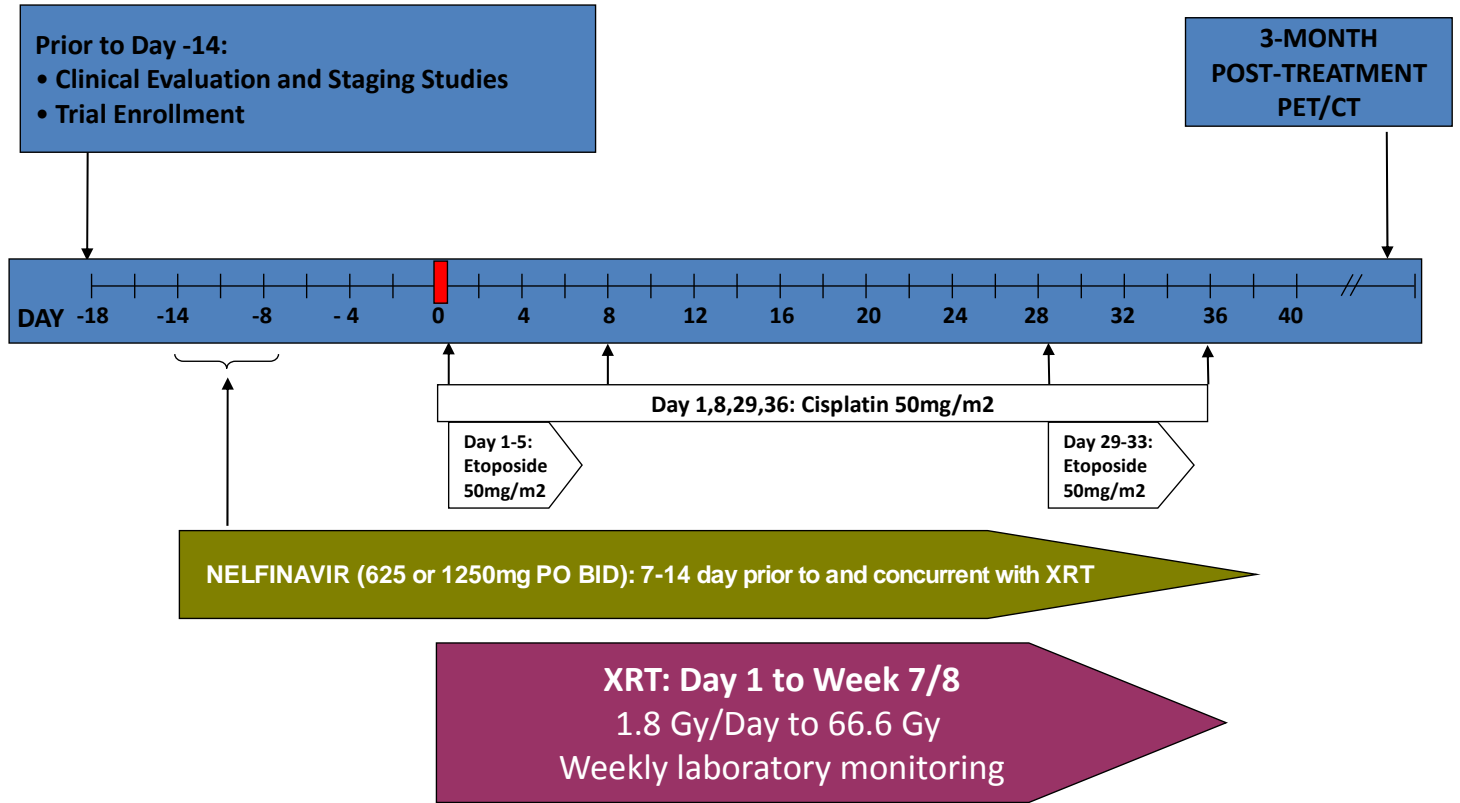

Supplement: jamaoncol-5-1464-s001.pdf [file jamaoncol-5-1464-s001.pdf]
